# Supplementary material for: Highly dispersed and stable nano zero-valent iron doped electrospun carbon nanofiber composite for aqueous hexavalent chromium removal
Source: Royal Society of Chemistry journal article supplement (doi:10.1039/d2ra00193d), 2022-01-01
Supplement: d2ra00193d1.pdf [file d2ra00193d1.pdf]

# Highly Dispersed and Stable Nano Zero-Valent Iron Doped Electrospun Carbon Nanofibers Composite for Aqueous Hexavalent Chromium Removal

Qijian Niu<sup>1#</sup>, Meili Liu<sup>2#</sup>, Longyang Fang<sup>2</sup>, Yangyang Yu<sup>2</sup>, Liang Cheng<sup>2,3\*</sup>, Tianyan You<sup>1\*</sup>

1. Key Laboratory of Modern Agriculture Equipment and Technology, School of Agricultural Engineering, Jiangsu University, Zhenjiang, Jiangsu, 212013, China

2. School of Environment and Safety Engineering, Jiangsu University, Zhenjiang, Jiangsu, 212013, China

3. School of Civil and Mechanical Engineering, Curtin University, Perth, 6102, Australia

# The two authors who contributed equally to the work should be considered co-first authors.

\* Corresponding authors: Liang Cheng      E-mail: clcheng@ujs.edu.cn  
Tianyan You      E-mail: youty@ujs.edu.cn

**Table S1.** The EDS survey of 60%-nZVI-CNFs.

| Elements | Weight percentage (%) | Atomic percentage (%) |
|----------|-----------------------|-----------------------|
| C K      | 73.97                 | 86.14                 |
| O K      | 11.77                 | 10.29                 |
| Fe K     | 14.26                 | 3.57                  |
| Total    | 100.00                | 100.00                |

**Fig. S1** The XPS survey (A); Fe<sub>2p</sub> XPS spectra (B); Cr<sub>2p</sub> XPS spectra (C) of nZVI-CNFs reaction with pure water.

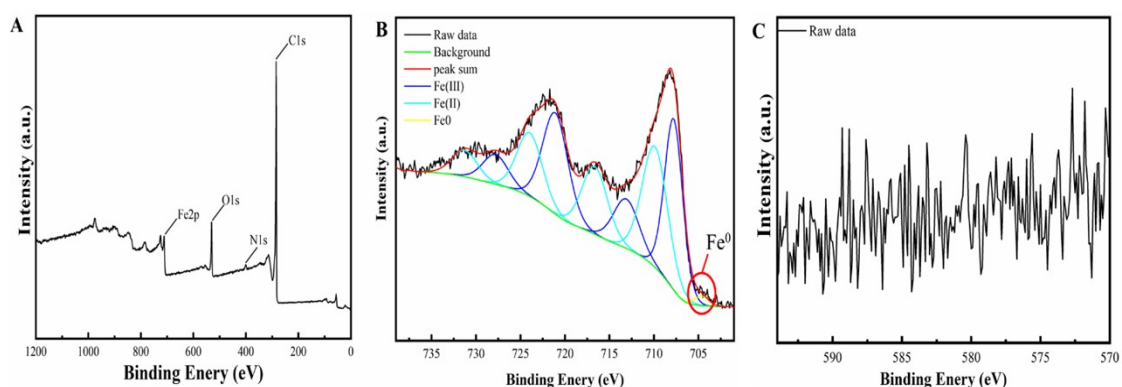

**Table S2.** The element content of nZVI-CNFs in different reaction conditions.

| Elements | Atomic %        |                   |                             |
|----------|-----------------|-------------------|-----------------------------|
|          | Before reaction | Reaction in water | Reaction in Cr(VI) solution |
| C1s      | 86.28           | 63.04             | 56.66                       |
| N1s      | 5.76            | 1.54              | 2.56                        |
| O1s      | 7.06            | 15.71             | 29.04                       |
| Fe2p     | 0.90            | 19.64             | 1.38                        |
| Cr2p     | 0               | 0.07              | 10.36                       |

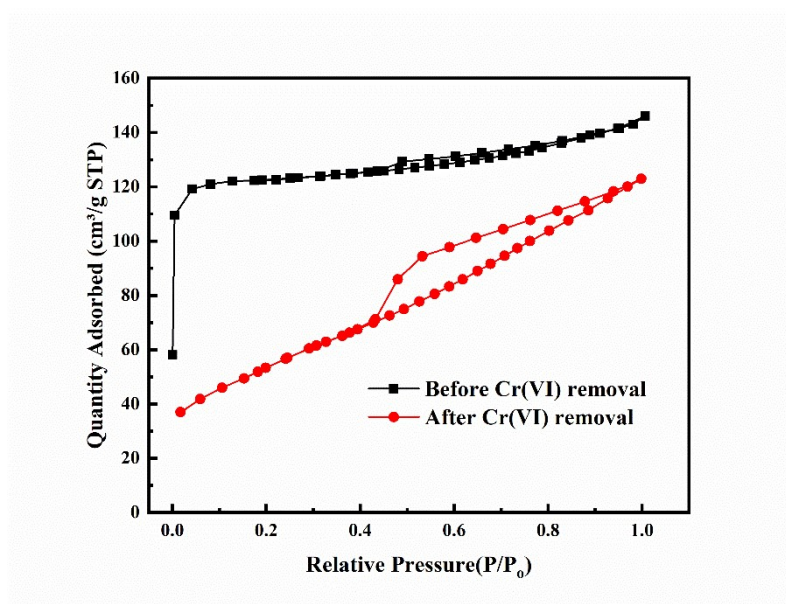

**Fig. S2** Nitrogen adsorption and desorption curve before and after Cr(VI) removal.
